# Supplementary material for: Highly efficient photoelectrochemical response by sea-urchin shaped ZnO/TiO2 nano/micro hybrid heterostructures co-sensitized with CdS/CdSe
Source: Royal Society of Chemistry journal article supplement (doi:10.1039/c3ta15439d), 2014-01-01
Supplement: c3ta15439d1.pdf [file c3ta15439d1.pdf]

## Supporting Information

*Highly Efficient Photoelectrochemical Response by Sea-Urchin Shaped  
ZnO/TiO<sub>2</sub> Nano/Micro Hybrid Heterostructures Co-sensitized with  
CdS/CdSe*

Zahid Ali<sup>a,b</sup>, Imran Shakir<sup>a</sup> and Dae Joon Kang<sup>a,\*</sup>

<sup>a</sup> Department of Physics, Institute of Basic Sciences, Sungkyunkwan University, Suwon 440-746, Republic of Korea

<sup>b</sup> National Institute of Lasers and Optronics, Islamabad, Pakistan

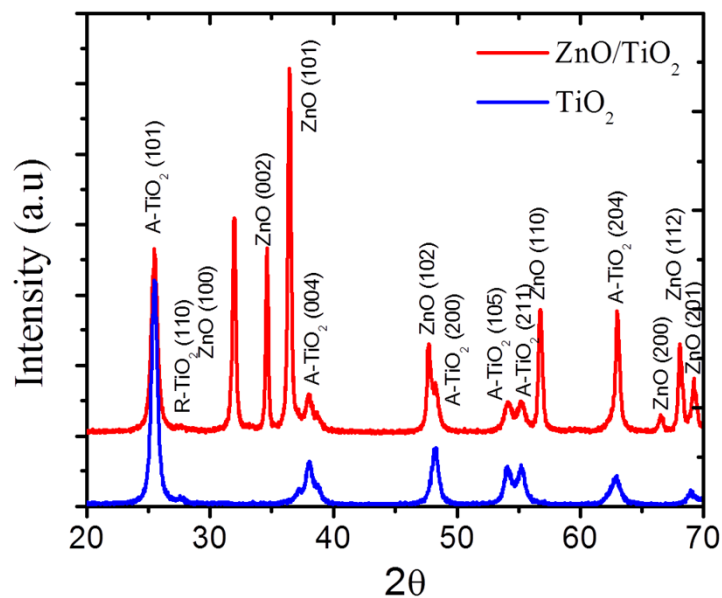

**Fig. S1.** XRD spectra of  $\text{TiO}_2$  microspheres and  $\text{ZnO}/\text{TiO}_2$  nano/micro hybrid heterostructures.

(A- $\text{TiO}_2$  and R- $\text{TiO}_2$  stand for anatase and rutile phase of  $\text{TiO}_2$ )

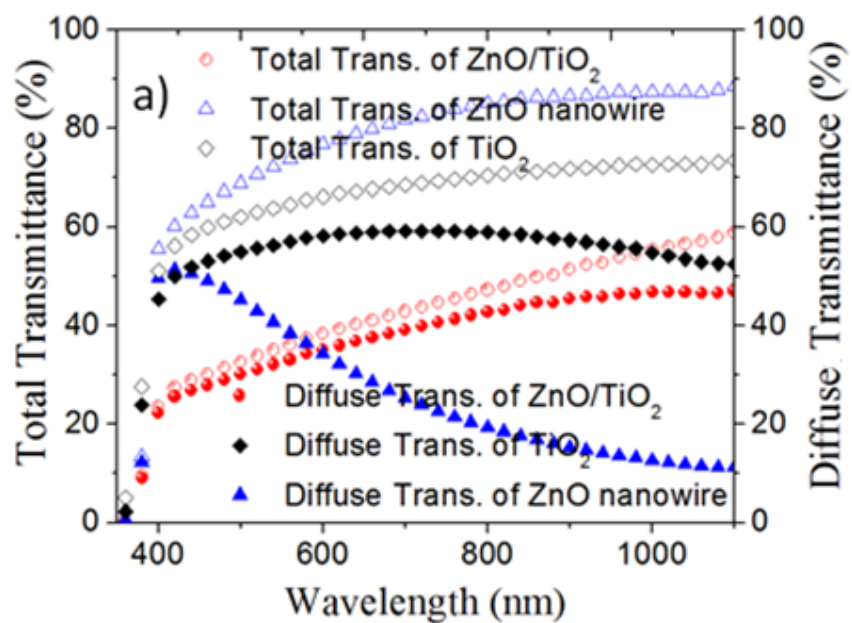

**Fig. S2.** Diffuse and total transmittance spectra of  $\text{TiO}_2$  microspheres,  $\text{ZnO}$  nanowires, and  $\text{ZnO}/\text{TiO}_2$  sea urchin structures.
